# Supplementary material
Source: MDPI journal article supplement (https://www.mdpi.com/1424-8247/17/4/532)
Supplement: s1 [file s1]

**Supporting Information for**  
**Synergistic Biomedical Potential and Molecular Docking**  
**Analysis of Coumarin-Triazole Hybrids as Tyrosinase**  
**Inhibitors: Design, Synthesis, *In Vitro* Profiling and**  
***In Silico* Studies**

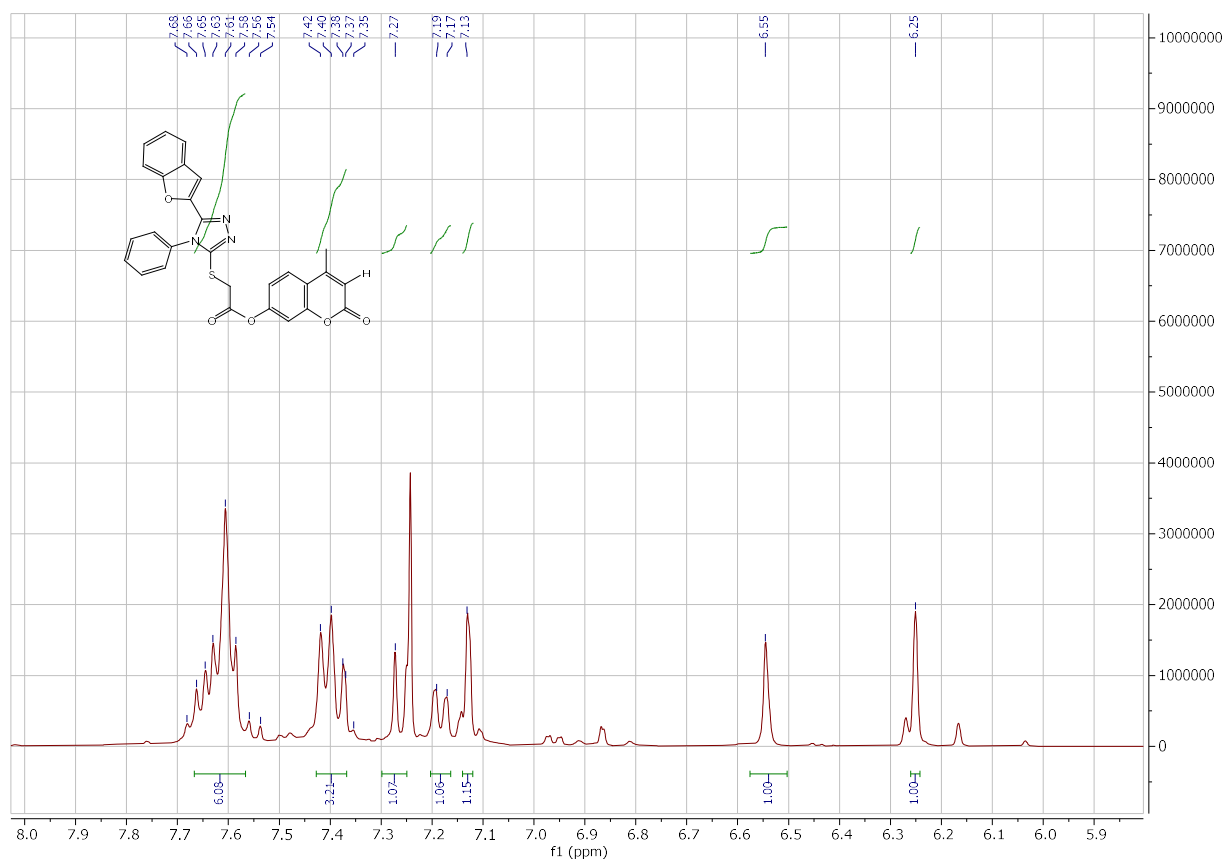

Figure S1:  $^1\text{H}$  NMR (400 MHz,  $\text{CDCl}_3$ ) of **17a**

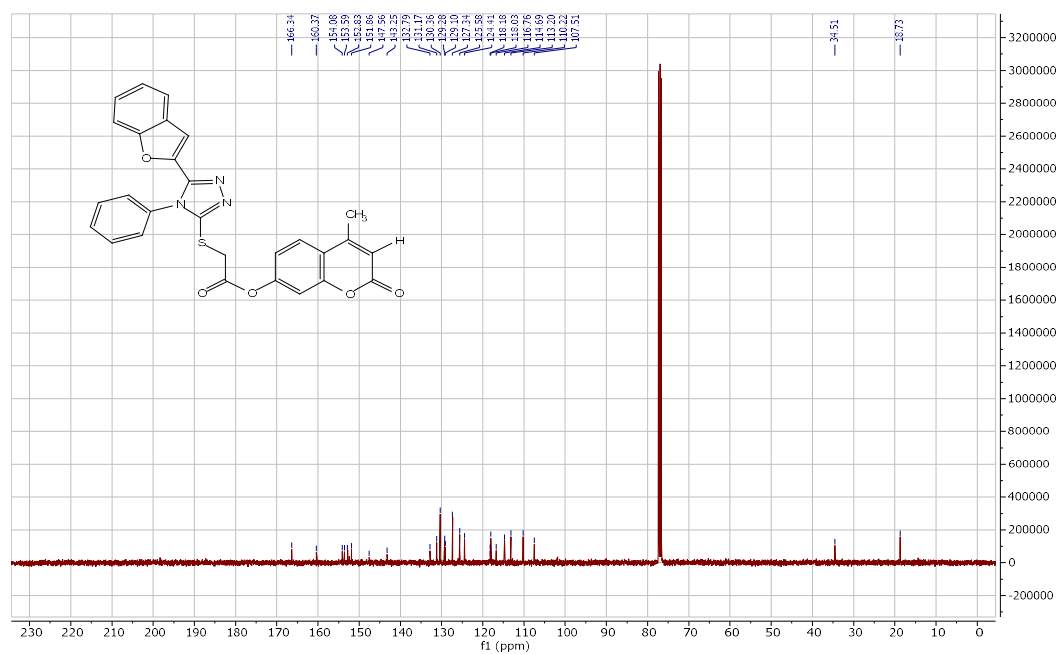

Figure S2:  $^{13}\text{C}$  NMR (100 MHz,  $\text{CDCl}_3$ ) of **17a**

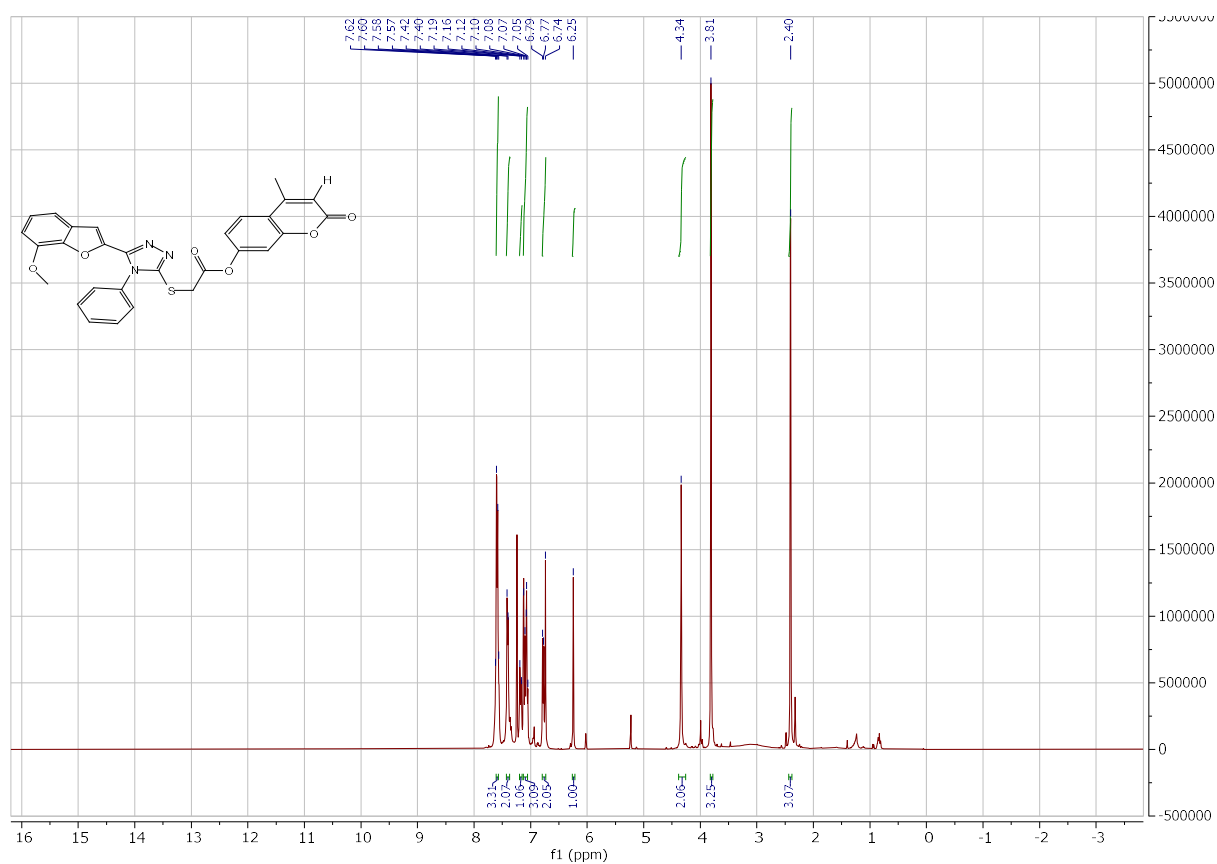

Figure S3:  $^1\text{H}$  NMR (400 MHz,  $\text{CDCl}_3$ ) of **17b**

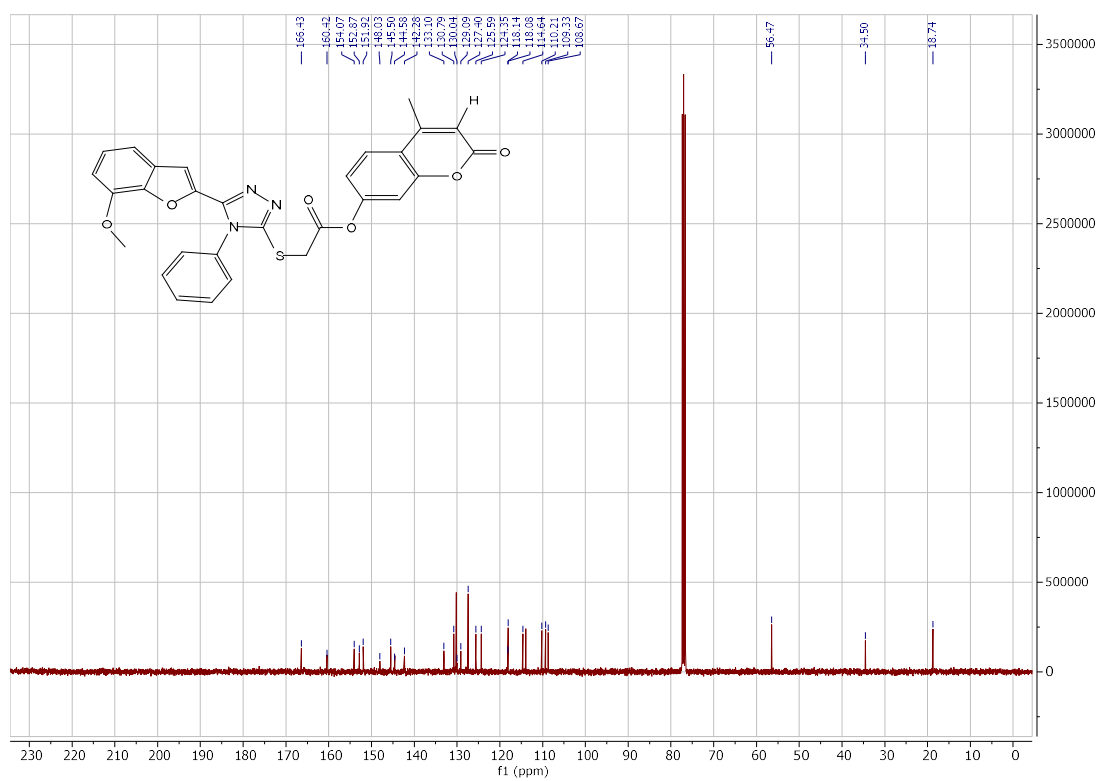

Figure S4:  $^{13}\text{C}$  NMR (100 MHz,  $\text{CDCl}_3$ ) of **17b**

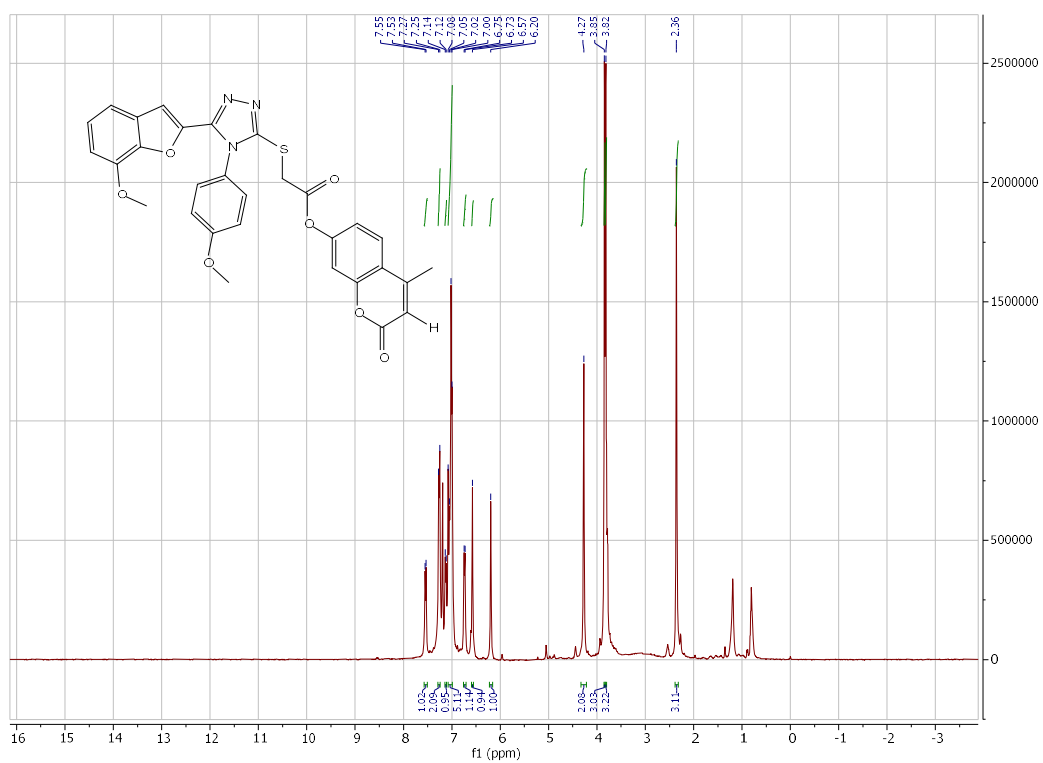

Figure S5: <sup>1</sup>H NMR (400 MHz, CDCl<sub>3</sub>) of **17c**

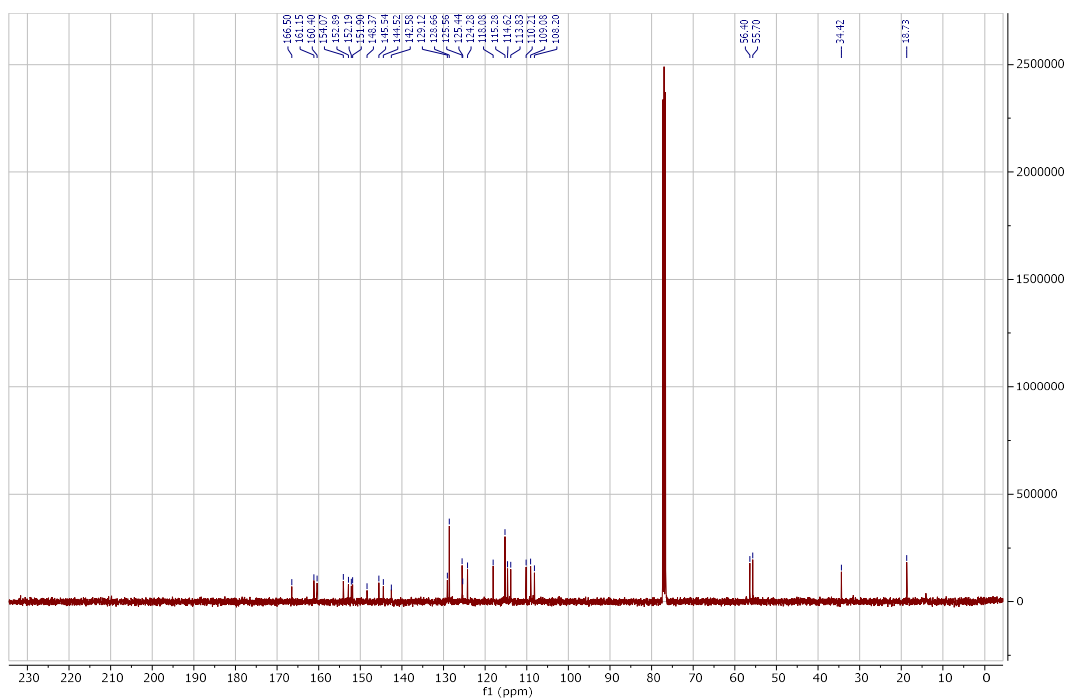

Figure S6: <sup>13</sup>C NMR (100 MHz, CDCl<sub>3</sub>) of **17c**

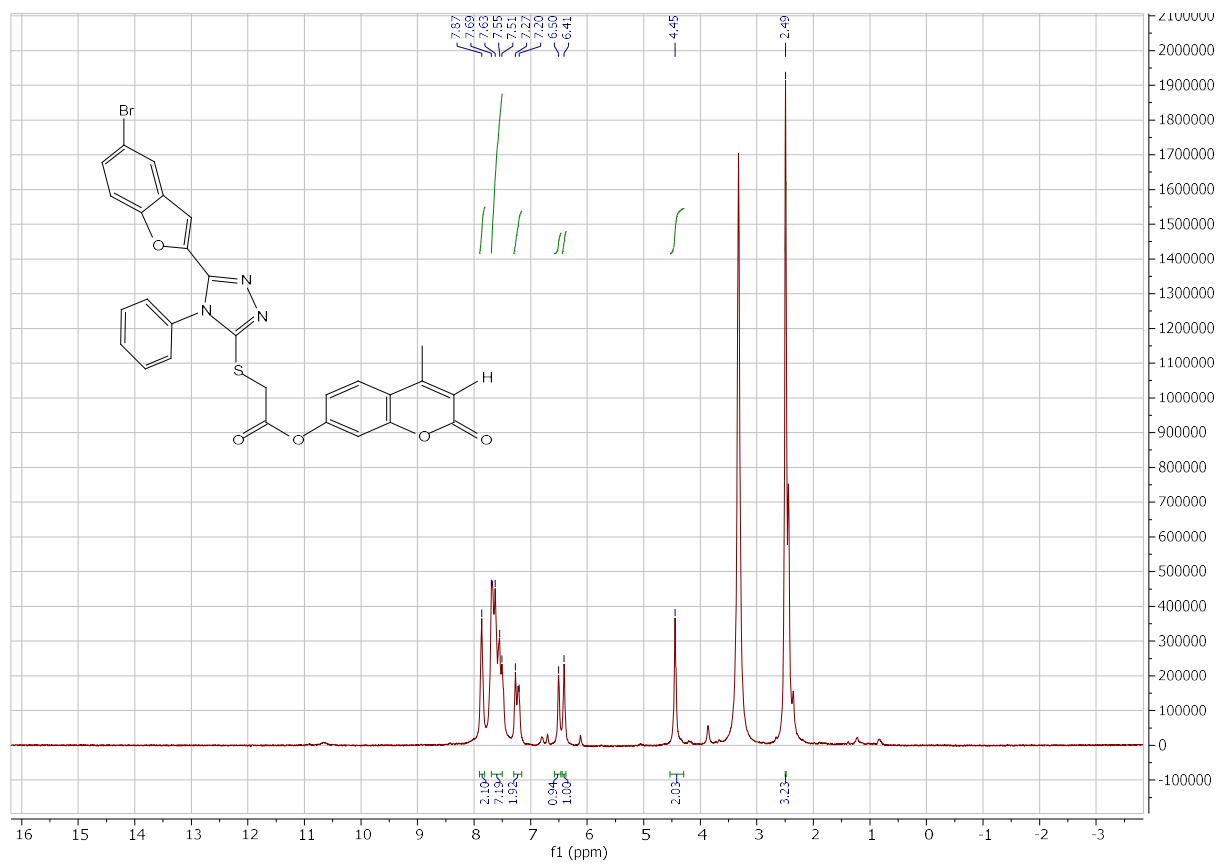

Figure S7:  $^1\text{H}$  NMR (400 MHz,  $\text{CDCl}_3$ ) of **17d**

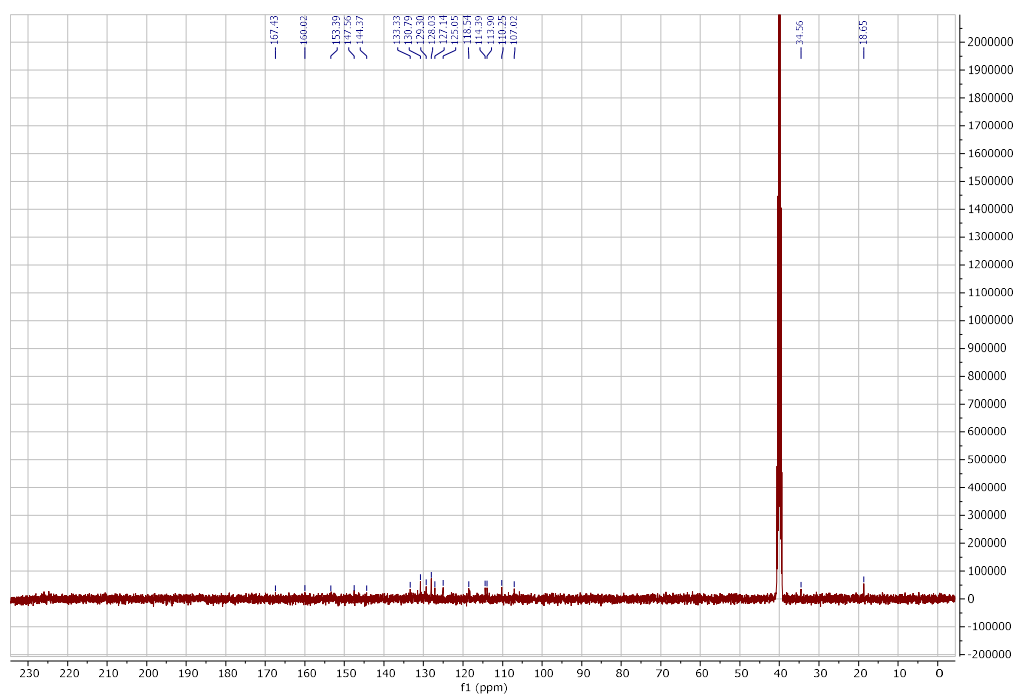

Figure S8: <sup>13</sup>C NMR (100 MHz, CDCl<sub>3</sub>) of **17d**

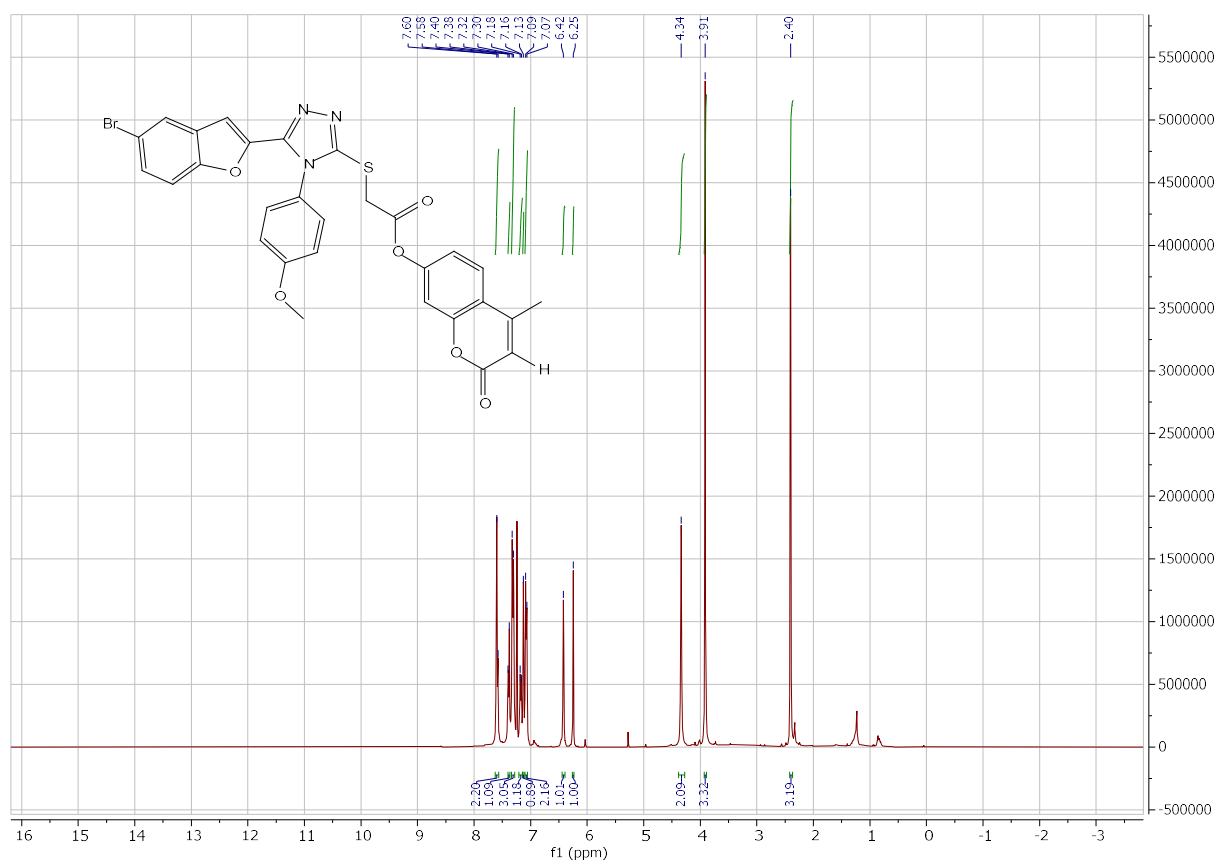

Figure S9: <sup>1</sup>H NMR (400 MHz, CDCl<sub>3</sub>) of **17e**



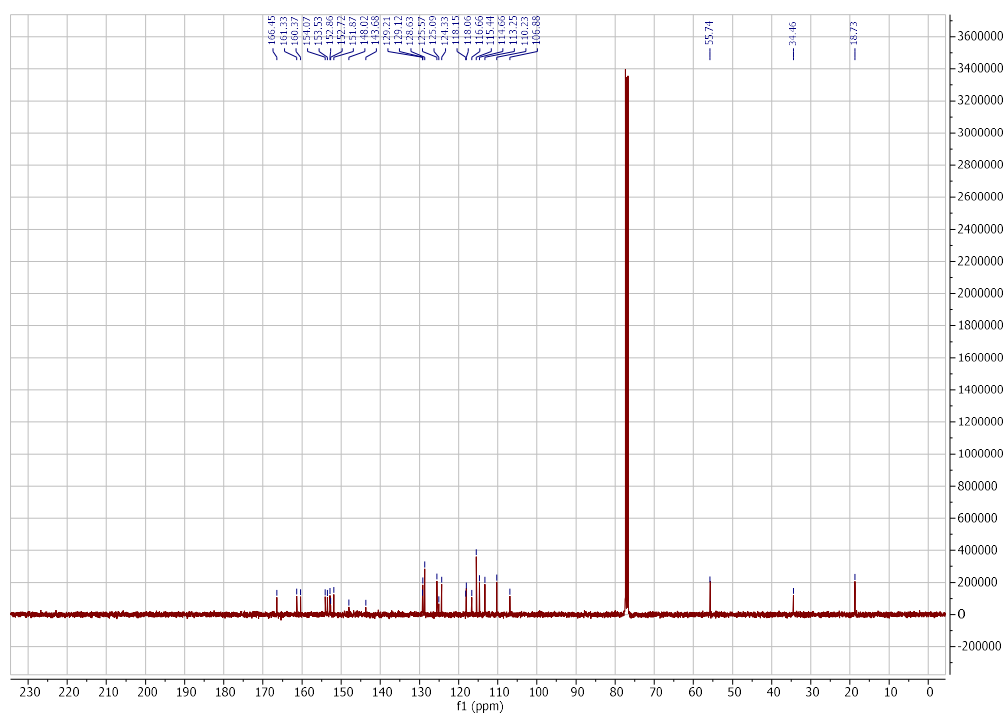

Figure S10: <sup>13</sup>C NMR (100 MHz, CDCl<sub>3</sub>) of **17e**

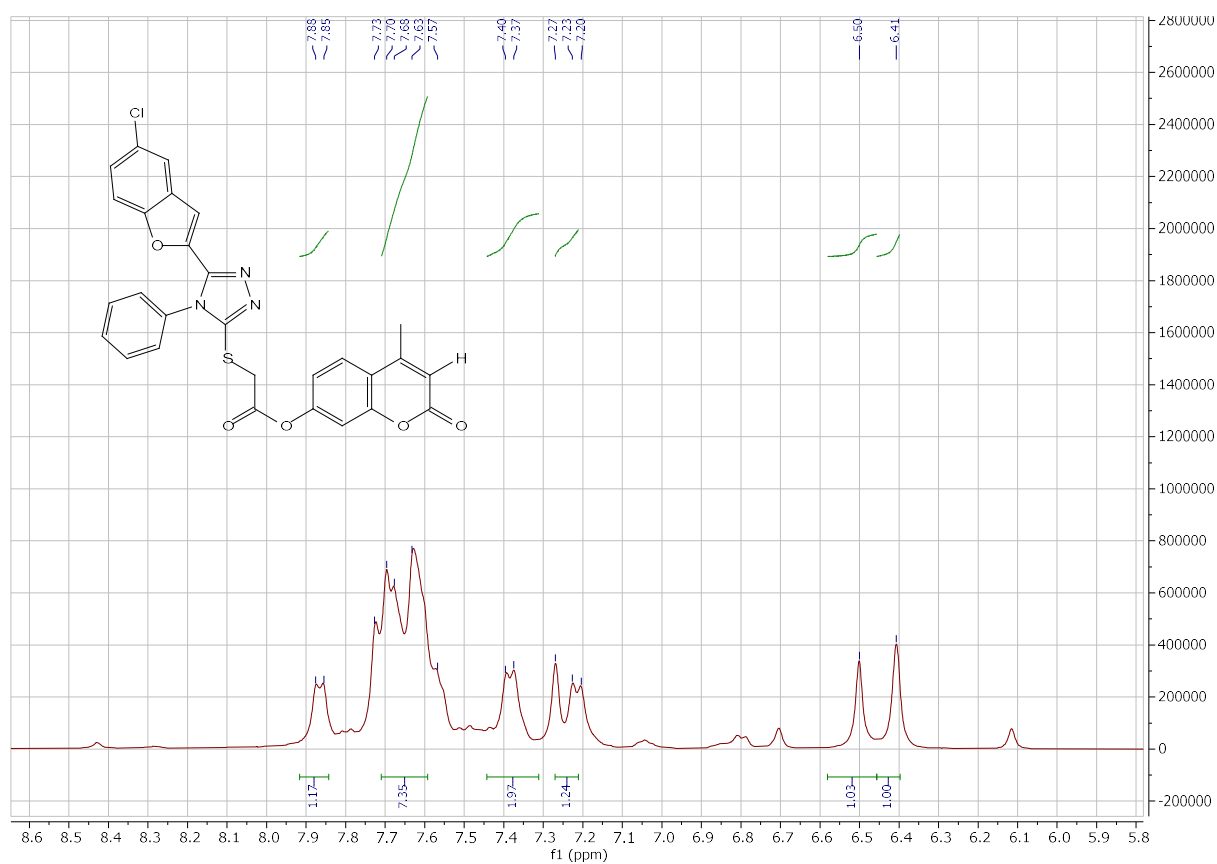

Figure S11:  $^1\text{H}$  NMR (400 MHz,  $\text{CDCl}_3$ ) of **17f**

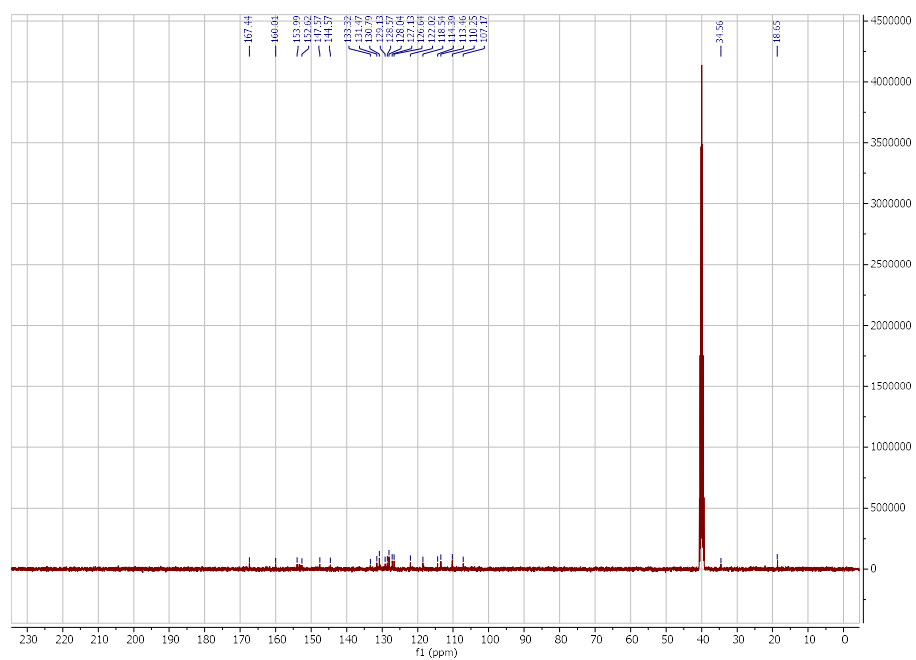

Figure S12:  $^{13}\text{C}$  NMR (100 MHz,  $\text{CDCl}_3$ ) of **17f**

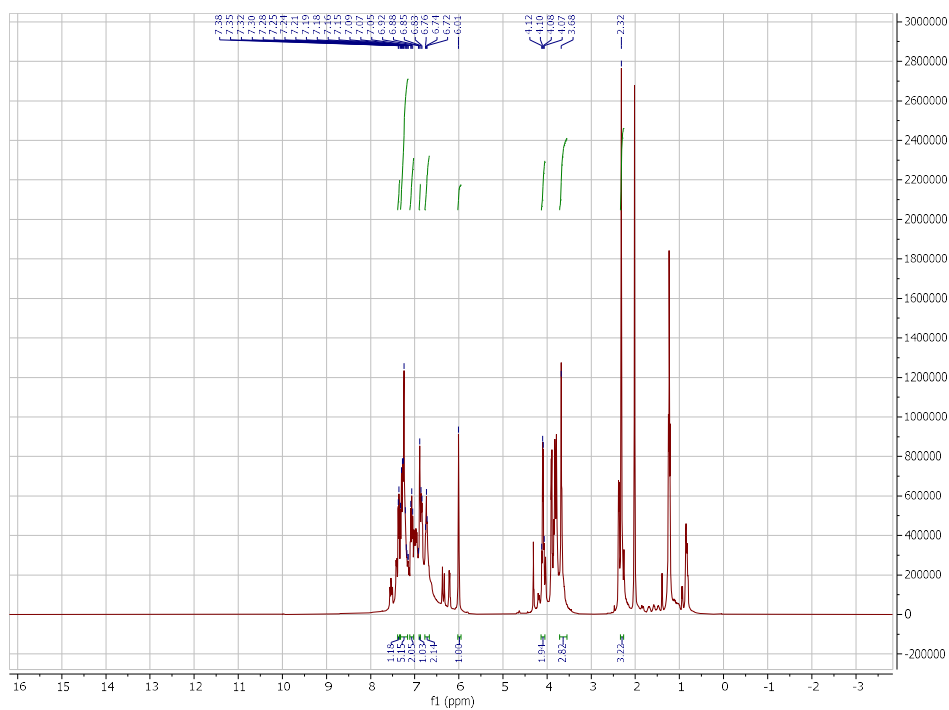

Figure S13:  $^1\text{H}$  NMR (400 MHz,  $\text{CDCl}_3$ ) of **17g**



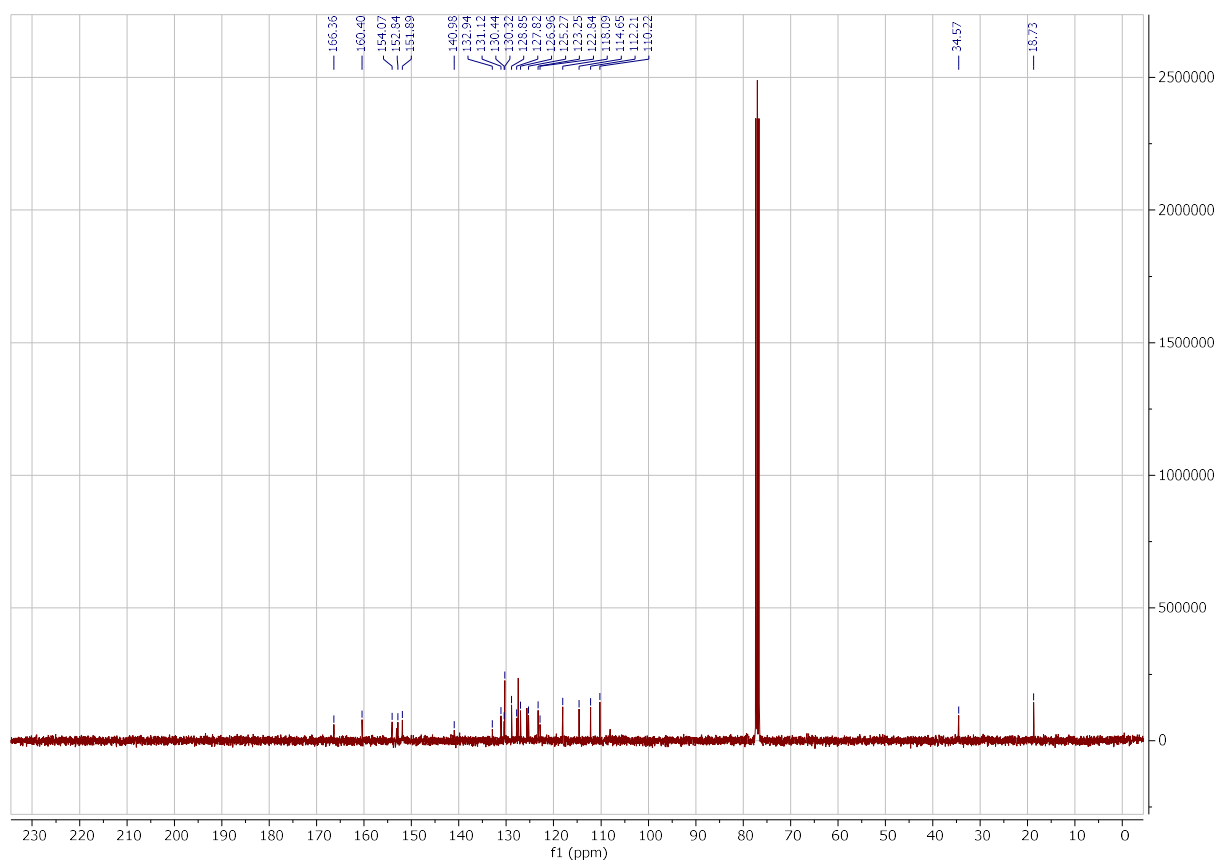

Figure S16: <sup>13</sup>C NMR (100 MHz, CDCl<sub>3</sub>) of **17h**
